# Supplementary material for: Positional effects of fluorine substitution on room temperature phosphorescence in hexaphenylmelamine derivatives
Source: Royal Society of Chemistry journal article supplement (doi:10.1039/d4nj04627g), 2024-12-13
Supplement: d4nj04627g1.pdf [file d4nj04627g1.pdf]

## Supporting Information

### Positional Effects of Fluorine Substitution on Room Temperature Phosphorescence in Hexaphenylmelamine Derivatives

Qiang Guo<sup>a,d</sup>, Zixuan Huang<sup>a</sup>, Jiaqi Liu<sup>a</sup>, Xiaoyu Li<sup>b</sup>, Yanqiong Zheng<sup>c</sup>, Xiuying Gao<sup>\*a,e</sup>, Hui Liu<sup>\*a</sup>, Jie Li<sup>\*a</sup>

<sup>a</sup> College of Optoelectronic Engineering, Chengdu University of Information Technology, Chengdu 610225, China.

<sup>b</sup> Southwest University of Science and Technology, Mianyang 621010, China

<sup>c</sup> Key Laboratory of Advanced Display and System Applications of Ministry of Education, School of Mechatronic Engineering and Automation, Shanghai University, Shanghai 200072, China.

<sup>d</sup> HONGCHANG Chem. Co., Ltd. Guangdong

<sup>e</sup> TRULY (Renshou) High-End Display Technology Limited

\* E-mail: lijie@cuit.edu.cn

## Table of Contents

|                                                                                              |     |
|----------------------------------------------------------------------------------------------|-----|
| I. General remarks.....                                                                      | S2  |
| II. Synthesis procedures.....                                                                | S2  |
| III. Photophysical properties.....                                                           | S4  |
| IV. Theoretical calculations.....                                                            | S7  |
| V. References.....                                                                           | S11 |
| VI. Copies of <sup>1</sup> H NMR, <sup>13</sup> C NMR and HRMS spectra of HPM-F isomers..... | S13 |

## I. General remarks

### 1. Materials

Unless otherwise noted, diphenylamine, cyanuric chloride, *n*-BuLi (2.5 M in hexane) and extra dry solvents (THF stored with molecular sieves) were obtained from commercial suppliers and used without further purification. 2-Fluoro-*N*-phenylaniline, 3-fluoro-*N*-phenylaniline [S1], 4-fluoro-*N*-phenylaniline [S2] and 2-chloro-4,6-bis(diphenylamino)-1,3,5-triazine [S3] were prepared according to the literatures.

### 2. Instrumentation

NMR spectra were obtained on a Varian Inova 400 spectrometer. The  $^1\text{H}$  NMR (400 MHz) and  $^{13}\text{C}$  NMR (100 MHz) chemical shifts were measured relative to  $\text{CDCl}_3$  as the internal reference ( $\text{CDCl}_3$ :  $\delta = 7.26$  ppm for  $^1\text{H}$  and  $\delta = 77.16$  ppm for  $^{13}\text{C}$ , respectively). High-resolution mass spectra (HRMS) were obtained with Waters-Q-TOF-Premier (ESI<sup>+</sup>). Single-crystal X-ray diffraction data for the compounds were obtained by using Bruker APEX-II CCD diffractometer with Mo radiation (for HPM-*o*-F and HPM-*m*-F) or a New Gemini, Dual, Cu at zero, EosS2 diffractometer (for HPM-*p*-F) at 298.00 K during data collection. Using Olex2 [S4], the structure was solved with the ShelXT [S5] structure solution program using Intrinsic Phasing and refined with the ShelXL [S6] refinement package using Least Squares minimisation (for HPM-*o*-F and HPM-*m*-F) or with olex2.refine [S7] refinement package using Levenberg-Marquardt minimisation (for HPM-*p*-F). Photoluminescence measurements at 77K were carried out by FLS-920 spectrophotometer. Room-temperature phosphorescence (RTP) spectra were measured using HITACHI F-7100 FL spectrophotometer (phosphorescence mode, chopping speed: 40 Hz). The RTP lifetimes were collected on a HORIBA TEMPRO-01 instrument. The phosphorescence quantum yields were determined by FLS-980 with integrating sphere systems under ambient conditions.

## II. Synthesis procedures

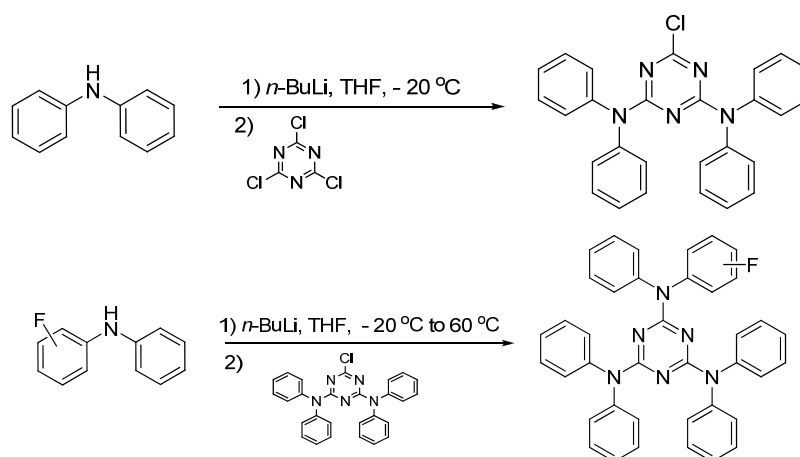

Scheme S1 Synthesis of HPM-F isomers.

**2-[*N,N*-(2-fluorophenyl)phenylamino]-4,6-bis(diphenylamino)-1,3,5-triazine (HPM-*o*-F):** 4-Fluoro-*N*-phenylaniline (617.8 mg, 3.3 mmol) and 30 mL dry THF were placed in a flame-dried Schlenk tube with a magnetic stir bar under a N<sub>2</sub> atmosphere. Then the solution was cooled to -20 °C and *n*-BuLi (2.5 M in hexane, 1.45 mL, 3.63 mmol) was dropped slowly into the solution. The mixture was then warmed to room temperature and 2-chloro-4,6-bis(diphenylamino)-1,3,5-triazine (1.35 g, 3 mmol) was added. The mixture was heated at 60 °C overnight. A large amount of solid product was precipitated. The precipitation was filtered and washed with ethanol several times. The desired product was then recrystallized from xylene and dried in vacuo to give a white solid (760 mg, 42%). <sup>1</sup>H NMR (400 MHz, CDCl<sub>3</sub>): δ = 7.08-7.17 (m, 22 H), 7.00-7.05 (m, 5H), 6.93-6.97 (m, 2H) ppm. <sup>13</sup>C NMR (100 MHz, CDCl<sub>3</sub>): δ = 165.9, 165.6, 160.0, 157.5, 143.6, 142.6, 130.3, 128.3, 128.2, 127.9, 127.8, 127.6, 126.5, 125.0, 124.9, 124.3, 116.4, 116.2 ppm. HRMS (ESI<sup>+</sup>): calcd. for C<sub>39</sub>H<sub>29</sub>FN<sub>6</sub>, [M+H]<sup>+</sup> 601.2516, found 601.2519.

**2-[*N,N*-(3-fluorophenyl)phenylamino]-4,6-bis(diphenylamino)-1,3,5-triazine (HPM-*m*-F):** 4-Fluoro-*N*-phenylaniline (280.8 mg, 1.5 mmol) and 10 mL dry THF were placed in a flame-dried Schlenk tube with a magnetic stir bar under a N<sub>2</sub> atmosphere. Then the solution was cooled to -20 °C and *n*-BuLi (2.5 M in hexane, 0.72 mL, 1.8 mmol) was dropped slowly into the solution. The mixture was then warmed to room temperature and 2-chloro-4,6-bis(diphenylamino)-1,3,5-triazine (449.9 mg, 1 mmol) was added. The mixture was heated at 60 °C overnight. A large amount of solid product was precipitated. The precipitation was filtered and washed with methanol several times. The desired product was then recrystallized from xylene and dried in vacuo to give a white solid (334 mg, 56%). <sup>1</sup>H NMR (400 MHz, CDCl<sub>3</sub>): δ = 7.00-7.17 (m, 26 H), 6.82-6.92 (m, 2H), 6.69-6.73 (m, 1H) ppm. <sup>13</sup>C NMR (100 MHz, CDCl<sub>3</sub>): δ = 165.8, 165.7, 143.5, 143.2, 129.2, 129.1, 128.6, 128.4, 127.9, 127.6, 125.5, 125.2, 122.7, 114.8, 114.6, 111.8, 111.6, 110.2 ppm. HRMS (ESI<sup>+</sup>): calcd. for C<sub>39</sub>H<sub>29</sub>FN<sub>6</sub>, [M+H]<sup>+</sup> 601.2516, found 601.2506.

**2-[*N,N*-(4-fluorophenyl)phenylamino]-4,6-bis(diphenylamino)-1,3,5-triazine (HPM-*p*-F):** 4-Fluoro-*N*-phenylaniline (374.4 mg, 2 mmol) and 10 mL dry THF were placed in a flame-dried Schlenk tube with a magnetic stir bar under a N<sub>2</sub> atmosphere. Then the solution was cooled to -20 °C and *n*-BuLi (2.5 M in hexane, 0.96 mL, 2.4 mmol) was dropped slowly into the solution. The mixture was then warmed to room temperature and 2-chloro-4,6-bis(diphenylamino)-1,3,5-triazine (899.9 mg, 2 mmol) was added. The mixture was heated at 60 °C overnight. A large amount of solid product was precipitated. The precipitation was

filtered and washed with methanol several times. The desired product was then recrystallized from xylene and dried in vacuo to give a white solid (722 mg, 60%).  $^1\text{H}$  NMR (400 MHz,  $\text{CDCl}_3$ ):  $\delta = 7.10\text{-}7.16$  (m, 20 H),  $7.03\text{-}7.07$  (m, 7H),  $6.76\text{-}6.82$  (m, 2H) ppm.  $^{13}\text{C}$  NMR (100 MHz,  $\text{CDCl}_3$ ):  $\delta = 165.8, 165.7, 161.4, 158.9, 143.5, 143.3, 139.54, 139.51, 129.4, 129.3, 128.39, 128.36, 127.6, 127.3, 125.1, 125.0, 115.2, 115.0$  ppm. HRMS (ESI $^+$ ): calcd. for  $\text{C}_{39}\text{H}_{29}\text{FN}_6$ ,  $[\text{M}+\text{H}]^+$  601.2516, found 601.2512.

### III. Photophysical Properties

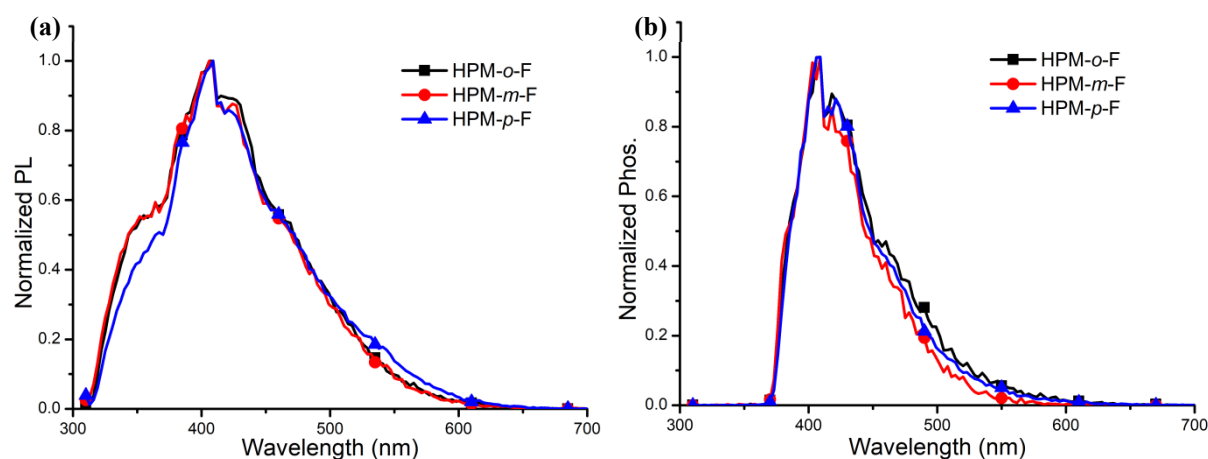

**Fig. S1** The photoluminescence (PL) spectra of HPM-F isomers in diluted 2-MeTHF solution at 77 K with (a) a detector delay of 0 ms and (b) a detector delay of 20 ms.

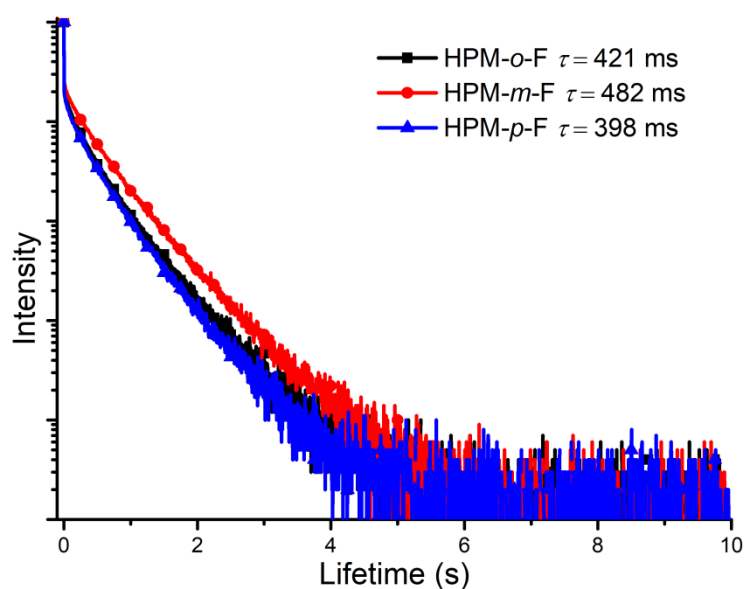

**Fig. S2** The time-resolved PL decay curves of HPM-F isomers in diluted 2-MeTHF solution at 77 K at 407 nm.

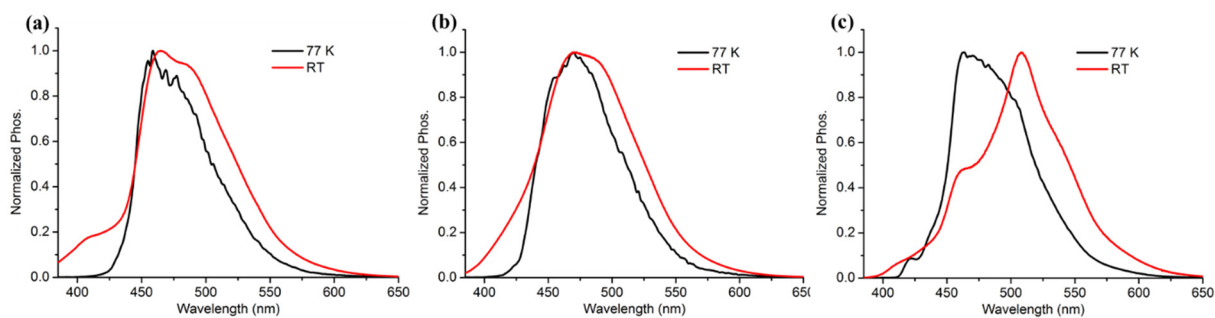

**Fig. S3** The phosphorescence spectra of (a) HPM-*o*-F, (b) HPM-*m*-F and (c) HPM-*p*-F in crystal state at 77 K and room temperature (RT), respectively.

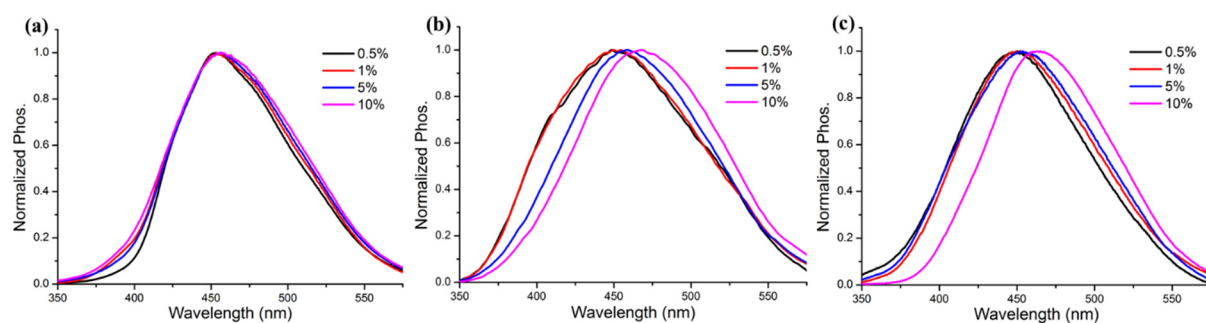

**Fig. S4** The phosphorescence spectra of (a) HPM-*o*-F, (b) HPM-*m*-F and (c) HPM-*p*-F at different doping concentrations (mass percent) in PMMA films.

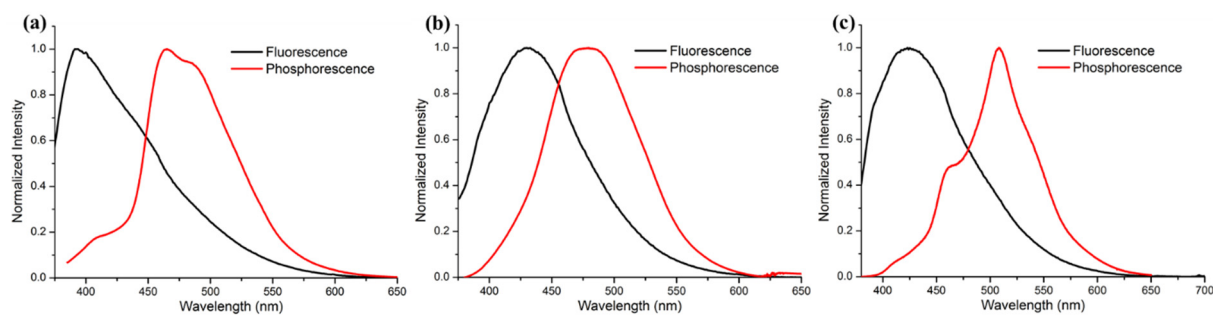

**Fig. S5** The fluorescence and phosphorescence spectra of (a) HPM-*o*-F, (b) HPM-*m*-F and (c) HPM-*p*-F in crystal state under ambient conditions. The estimated energy gaps between the singlet and triplet states ( $\Delta E_{ST}$ ), determined from the fluorescence and phosphorescence peak energies, were 0.50, 0.29, and 0.28 eV for HPM-*o*-F, HPM-*m*-F, and HPM-*p*-F, respectively.

**Table S1** The details of RTP lifetimes of HPM-F isomers in 2-MeTHF solution and crystals.

| State                 | Compound         | $\lambda_{\text{phos}}$ (nm) | $\tau_1$ (ms) | $A_1$ | $\tau_2$ (ms) | $A_2$ | $\tau^a$ (ms) |
|-----------------------|------------------|------------------------------|---------------|-------|---------------|-------|---------------|
| Solution <sup>b</sup> | HPM- <i>o</i> -F | 407                          | 220.1         | 0.39  | 550.0         | 0.61  | 421           |
|                       | HPM- <i>m</i> -F | 407                          | 259.7         | 0.33  | 591.4         | 0.67  | 482           |
|                       | HPM- <i>p</i> -F | 407                          | 197.6         | 0.33  | 498.8         | 0.67  | 398           |
| Crystal <sup>c</sup>  | HPM- <i>o</i> -F | 465                          | 39.2          | 0.67  | 185.8         | 0.33  | 88            |
|                       | HPM- <i>m</i> -F | 479                          | 14.0          | 0.73  | 177.1         | 0.27  | 58            |
|                       | HPM- <i>p</i> -F | 468                          | 45.7          | 0.79  | 311.5         | 0.21  | 103           |
|                       |                  | 507                          | 80.7          | 0.63  | 456.4         | 0.37  | 220           |

<sup>a</sup> The average lifetime  $\tau = \tau_1 \times A_1 + \tau_2 \times A_2$ ; <sup>b</sup> at 77 K; <sup>c</sup> under ambient condition.

**Table S2** Single crystal data of HPM-F isomers.

| Name                                                   | HPM- <i>o</i> -F                                                                                                                                                                                                                                                                       | HPM- <i>m</i> -F                                                                                                                                                                                                                                                                       | HPM- <i>p</i> -F                                                                                                                                                                                                                                                              |
|--------------------------------------------------------|----------------------------------------------------------------------------------------------------------------------------------------------------------------------------------------------------------------------------------------------------------------------------------------|----------------------------------------------------------------------------------------------------------------------------------------------------------------------------------------------------------------------------------------------------------------------------------------|-------------------------------------------------------------------------------------------------------------------------------------------------------------------------------------------------------------------------------------------------------------------------------|
| Formula                                                | C <sub>39</sub> H <sub>29</sub> FN <sub>6</sub>                                                                                                                                                                                                                                        | C <sub>39</sub> H <sub>29</sub> FN <sub>6</sub>                                                                                                                                                                                                                                        | C <sub>39</sub> H <sub>29</sub> FN <sub>6</sub>                                                                                                                                                                                                                               |
| Space Group                                            | <i>R</i> -3 <i>c</i>                                                                                                                                                                                                                                                                   | <i>R</i> -3 <i>c</i>                                                                                                                                                                                                                                                                   | <i>R</i> -3 <i>c</i>                                                                                                                                                                                                                                                          |
| Cell Lengths (Å)                                       | a=14.3978(4)<br>b=14.3978(4)<br>c= 25.6230(11)                                                                                                                                                                                                                                         | a=14.3814(4)<br>b=14.3814(4)<br>c=25.5525(13)                                                                                                                                                                                                                                          | a=14.5389(9)<br>b=14.5389(9)<br>c=25.5523(16)                                                                                                                                                                                                                                 |
| Cell Angles (°)                                        | a =90<br>b =90<br>c =120                                                                                                                                                                                                                                                               | a =90<br>b =90<br>c =120                                                                                                                                                                                                                                                               | a =90<br>b =90<br>c =120                                                                                                                                                                                                                                                      |
| Cell Volume (Å <sup>3</sup> )                          | 4599.9(3)                                                                                                                                                                                                                                                                              | 4576.8(3)                                                                                                                                                                                                                                                                              | 4677.6(6)                                                                                                                                                                                                                                                                     |
| Z                                                      | 6                                                                                                                                                                                                                                                                                      | 6                                                                                                                                                                                                                                                                                      | 6                                                                                                                                                                                                                                                                             |
| Density (g/cm <sup>3</sup> )                           | 1.301                                                                                                                                                                                                                                                                                  | 1.308                                                                                                                                                                                                                                                                                  | 1.279                                                                                                                                                                                                                                                                         |
| F(000)                                                 | 1884.0                                                                                                                                                                                                                                                                                 | 1884.0                                                                                                                                                                                                                                                                                 | 1884.0                                                                                                                                                                                                                                                                        |
| h <sub>max</sub> , k <sub>max</sub> , l <sub>max</sub> | 18,18,33                                                                                                                                                                                                                                                                               | 18,18,33                                                                                                                                                                                                                                                                               | 17,17,31                                                                                                                                                                                                                                                                      |
| CCDC number                                            | 2392815                                                                                                                                                                                                                                                                                | 2392813                                                                                                                                                                                                                                                                                | 2063809                                                                                                                                                                                                                                                                       |
| Refinement details:                                    | 1. Fixed Uiso<br>At 1.2 times of:<br>All C(H) groups, All F(H) groups<br>2. Restrained distances<br>C3-H3<br>0.94 with sigma of 0.001<br>3. Others<br>Fixed Sof: F1(0.16667)<br>H3(0.83333)<br>4.a Aromatic/amide H refined with riding coordinates:<br>C7(H7), C6(H6), C4(H4), C5(H5) | 1. Fixed Uiso<br>At 1.2 times of:<br>All C(H) groups, All F(H) groups<br>2. Restrained distances<br>C6-H6<br>0.94 with sigma of 0.001<br>3. Others<br>Fixed Sof: F1(0.16667)<br>H6(0.83333)<br>4.a Aromatic/amide H refined with riding coordinates:<br>C3(H3), C4(H4), C5(H5), C7(H7) | 1. Fixed Uiso<br>At 1.2 times of:<br>All C(H) groups<br>2. Restrained distances<br>C5-F1<br>1.38 with sigma of 0.02<br>3. Others<br>Fixed Sof: H5(0.83333)<br>F1(0.16667)<br>4. a Aromatic/amide H refined with riding coordinates:<br>C3(H3), C4(H4), C5(H5), C6(H6), C7(H7) |

#### IV. Theoretical calculations

The molecular coordinates of HPM-F isomers used for theoretical calculations were obtained from single-crystal data, with the coordinates of carbon and nitrogen atoms kept fixed while the positions of hydrogen and fluorine atoms were optimized using the PM7 semi-empirical method with the Gaussian 16 A.03 package [S8]. To optimize the  $S_0$ ,  $S_1$  and  $T_1$  geometries of the structures in solid states, a QM/MM method using a two-layer ONIOM approach based on the single-crystal data was employed. The central molecule was treated as the high layer and calculated using the QM method at the B3LYP-D3(BJ)/6-31G\* level for the  $S_0$  state and TDDFT B3LYP-D3(BJ)/6-31G\* level for the  $S_1$  and  $T_1$  state, respectively. Meanwhile, the surrounding molecules were frozen, treated as the low layer, and calculated using the MM method (UFF, embedded QEq charge) with the Gaussian package. The independent gradient model based on Hirshfeld partition (IGMH), natural transition orbitals (NTO) of HPM-F dimers were obtained by Multiwfn program and VMD program [S9-11]. The basis set superposition error (BSSE) corrected binding energies of dimers ( $\Delta E_{\text{bind,dimer}}$ ) of HPM-F isomers were calculated to estimate the strength of noncovalent intermolecular interactions with functional and basis set of M06-2X(BJ)/6-311+G(d,p). The excitation energies for the singlet and triplet states were calculated using the TDDFT B3LYP-D3(BJ)/6-31G\* method based on the optimized molecular structure at the  $S_0$  and  $T_1$  state, respectively, with the Gaussian package. The oscillator strength of the triplet states ( $T_1$ ) were calculated at the TDDFT B3LYP/cc-pVDZ level based on the optimized  $T_1$  molecular structure using Dalton program [S12]. The spin-orbit coupling (SOC) matrix elements between  $S_1$  and  $T_n$ , as well as  $T_1$  and  $S_0$ , were calculated at the TDDFT B3LYP/6-311G\*\* level, based on the optimized  $S_1$  and  $T_1$  molecular structures, respectively, using the Dalton program.

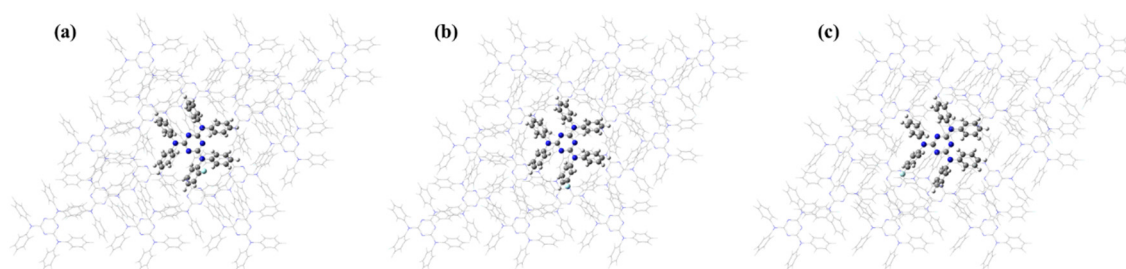

**Fig. S6** QM/MM model for crystal (a) HPM-*o*-F, (b) HPM-*m*-F, (c) HPM-*p*-F, respectively.

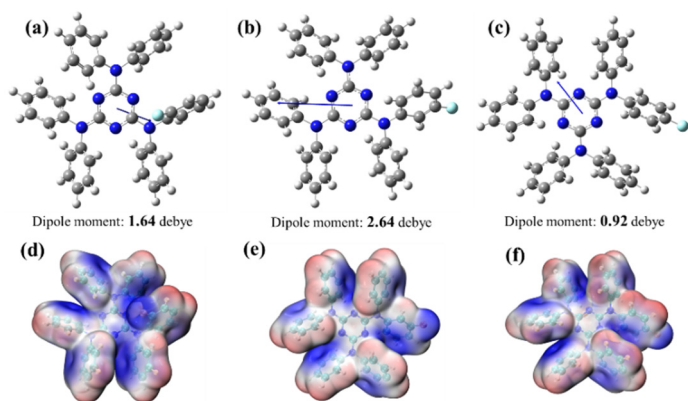

**Fig. S7** Calculated dipole moment of (a) HPM-*o*-F, (b) HPM-*m*-F, (c) HPM-*p*-F and electrostatic potential (ESP) diagram of (d) HPM-*o*-F, (e) HPM-*m*-F, (f) HPM-*p*-F at gas phase. (The potential energy range is -0.03 to 0.03 a.u. . Red areas indicate high electron density and blue areas suggest low electron density).

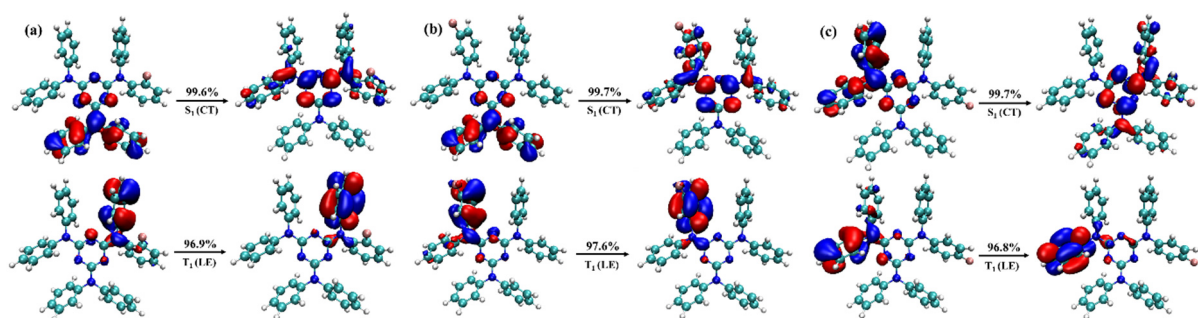

**Fig. S8** Calculated natural transition orbitals (NTO) of the  $S_1$  (based on  $S_1$  geometry) and  $T_1$  (based on  $T_1$  geometry) of (a) HPM-*o*-F, (b) HPM-*m*-F, (c) HPM-*p*-F, respectively, monomer at QM(B3LYP/6-31G\*)/MM level.

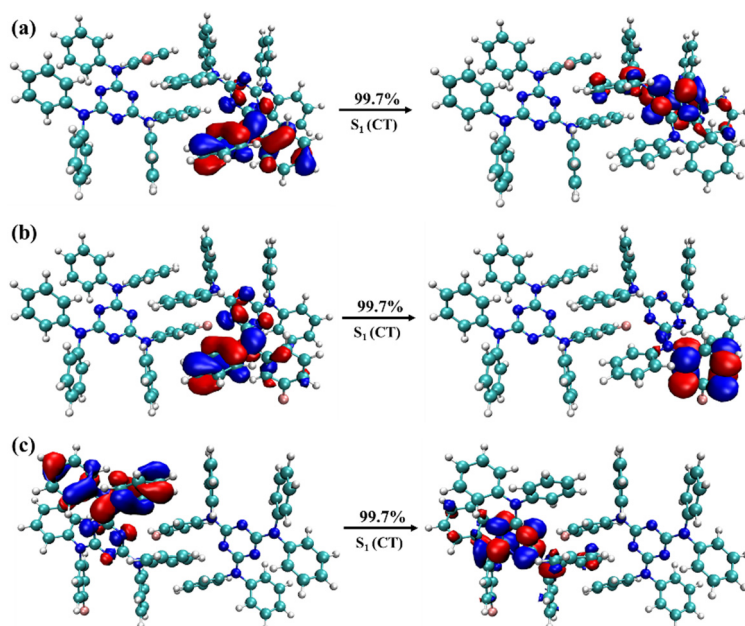

**Fig. S9** Calculated NTOs of the  $S_1$  (based on  $S_1$  geometry) of (a) HPM-*o*-F, (b) HPM-*m*-F, (c) HPM-*p*-F, respectively, dimer at QM(B3LYP/6-31G\*)/MM level.



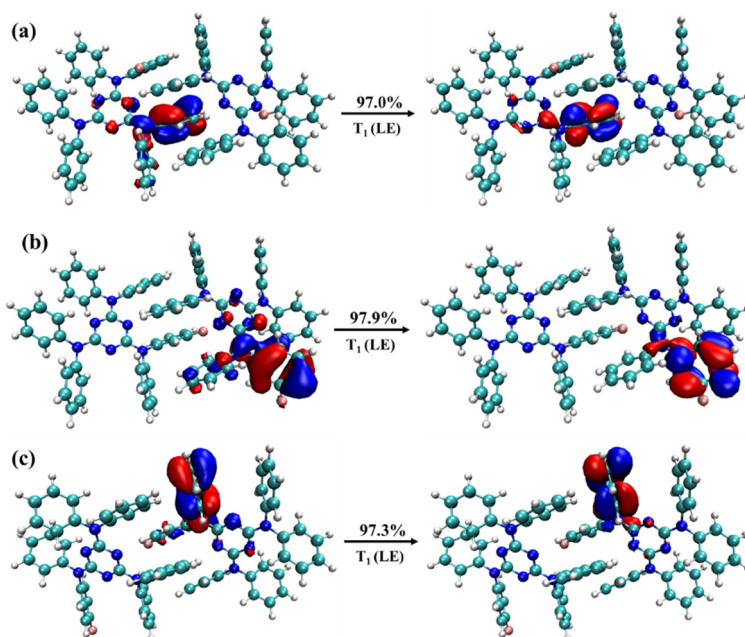

**Fig. S10** Calculated NTOs of the  $T_1$  (based on  $T_1$  geometry) of (a) HPM-*o*-F, (b) HPM-*m*-F, (c) HPM-*p*-F, respectively, dimer at QM(B3LYP/6-31G\*)/MM level.

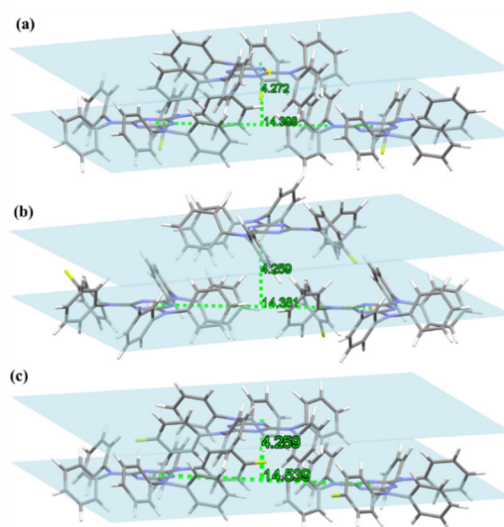

**Fig. S11** The local packing pictures were selected from the parts in cycles of corresponding entire ones, in which the interlamellar spacing and centroid-centroid distances of the involved triazine rings are listed (unit: Å). (a) HPM-*o*-F, (b) HPM-*m*-F, (c) HPM-*p*-F.

**Table S3** Intermolecular interactions and Hirshfeld surface analysis of HPM-*o*-F and HPM-*m*-F at crystalline state.

|                                                                                                    | HPM- <i>o</i> -F                                                                                                                                                                                                                                                                                                                                                 | HPM- <i>m</i> -F                                                                                                                                                                                                                                                                                                                                                  |
|----------------------------------------------------------------------------------------------------|------------------------------------------------------------------------------------------------------------------------------------------------------------------------------------------------------------------------------------------------------------------------------------------------------------------------------------------------------------------|-------------------------------------------------------------------------------------------------------------------------------------------------------------------------------------------------------------------------------------------------------------------------------------------------------------------------------------------------------------------|
| Intermolecular interactions                                                                        | 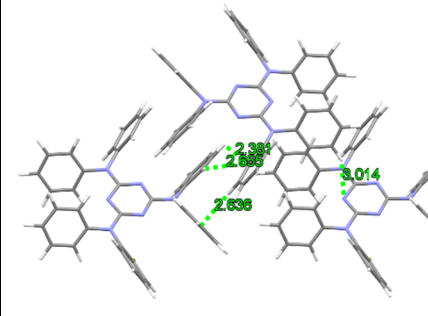                                                                                                                                                                                                                                                                                |                                                                                                                                                                                                                                                                                 |
| Hirshfeld surface                                                                                  |                                                                                                                                                                                                                                                                                 |                                                                                                                                                                                                                                                                                 |
| Fingerprint plot                                                                                   |                                                                                                                                                                                                                                                                                |                                                                                                                                                                                                                                                                                |
| Fingerprint plot                                                                                   |                                                                                                                                                                                                                                                                               |                                                                                                                                                                                                                                                                               |
| Relative contributions to the Hirshfeld surface area for the various close intermolecular contacts |  <ul style="list-style-type: none"> <li>C-H...H-C</li> <li>C-H...<math>\pi</math> and <math>\pi</math>...H-C</li> <li>C-H...N and N...H-C</li> <li>C-F...H-C and C-H...F-C</li> <li>C-F...<math>\pi</math> and <math>\pi</math>...F-C</li> <li>C-F...N and N...F-C</li> </ul> |  <ul style="list-style-type: none"> <li>C-H...H-C</li> <li>C-H...<math>\pi</math> and <math>\pi</math>...H-C</li> <li>C-H...N and N...H-C</li> <li>C-F...H-C and C-H...F-C</li> <li>C-F...<math>\pi</math> and <math>\pi</math>...F-C</li> <li>C-F...N and F...H-C</li> </ul> |

**Table S4** The IGMH and BSSE corrected binding energies of dimers ( $\Delta E_{\text{bind,dimer}}$ ) of HPM-F isomers in the adjacent layers or same layer.

|                 | HPM- <i>o</i> -F                                                                                                                                               | HPM- <i>m</i> -F                                                                                                                                                | HPM- <i>p</i> -F                                                                                                                                                 |
|-----------------|----------------------------------------------------------------------------------------------------------------------------------------------------------------|-----------------------------------------------------------------------------------------------------------------------------------------------------------------|------------------------------------------------------------------------------------------------------------------------------------------------------------------|
| Adjacent layers | 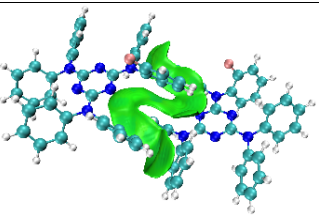<br>$\Delta E_{\text{bind,dimer}} = -15.74 \text{ kcal/mol}$                  | <br>$\Delta E_{\text{bind,dimer}} = -15.51 \text{ kcal/mol}$                  | <br>$\Delta E_{\text{bind,dimer}} = -16.46 \text{ kcal/mol}$                  |
| Same layer      | <br>$\Delta E_{\text{bind,dimer}}^{\text{parallel}} = -2.64 \text{ kcal/mol}$ | <br>$\Delta E_{\text{bind,dimer}}^{\text{parallel}} = -2.74 \text{ kcal/mol}$ | <br>$\Delta E_{\text{bind,dimer}}^{\text{parallel}} = -2.53 \text{ kcal/mol}$ |

## V. References

- [S1] X. Kong, H. Zhang, Y. Xiao, C. Cao, Y. Shi, G. Pang, *RSC Adv.*, 2015, **5**,7035–7048.
- [S2] J. Cao, J. R. Lever, T. Kopajtic, J. L. Katz, A. T. Pham, M. L. Holmes, J. B. Justice, A. H. Newman, *J. Med. Chem.*, 2004, **47**, 6128–6136.
- [S3] Z-F. An, R.-F. Chen, J. Yin, G.-H. Xie, H.-F. Shi, T. Tsuboi, W. Huang, *Chem. Eur. J.*, 2011, **17**, 10871–10878.
- [S4] O. V Dolomanov, L. J. Bourhis, R. J. Gildea, J. A. K. Howard, H. Puschmann, *J. Appl. Cryst.*, 2009, **42**, 339–341.
- [S5] G. M. Sheldrick, *Acta Cryst. A*, 2015, **71**, 3–8.
- [S6] G. M. Sheldrick, *Acta Cryst. C*, 2015, **71**, 3–8.
- [S7] L. J. Bourhis, O. V. Dolomanov, R. J. Gildea, J. A. K. Howard, H. Puschmann, *Acta Cryst. A*, 2015, **71**, 59-75.
- [S8] Gaussian 16, Revision A.03, M. J. Frisch, G. W. Trucks, H. B. Schlegel, G. E. Scuseria, M. A. Robb, J. R. Cheeseman, G. Scalmani, V. Barone, G. A. Petersson, H. Nakatsuji, X. Li, M. Caricato, A. V. Marenich, J. Bloino, B. G. Janesko, R. Gomperts, B. Mennucci, H. P. Hratchian, J. V. Ortiz, A. F. Izmaylov, J. L. Sonnenberg, D. Williams-Young, F. Ding, F. Lipparini, F. Egidi, J. Goings, B. Peng, A. Petrone, T. Henderson, D. Ranasinghe, V. G. Zakrzewski, J. Gao, N. Rega, G. Zheng, W. Liang, M. Hada, M. Ehara, K. Toyota, R. Fukuda, J. Hasegawa, M. Ishida, T. Nakajima, Y. Honda, O. Kitao, H. Nakai, T. Vreven, K. Throssell, J. A. Montgomery, Jr., J. E. Peralta, F. Ogliaro, M. J. Bearpark, J. J. Heyd, E. N. Brothers, K. N. Kudin, V. N. Staroverov, T. A. Keith, R. Kobayashi, J. Normand, K. Raghavachari, A. P. Rendell, J. C. Burant, S. S. Iyengar, J. Tomasi, M. Cossi, J. M. Millam,

- M. Klene, C. Adamo, R. Cammi, J. W. Ochterski, R. L. Martin, K. Morokuma, O. Farkas, J. B. Foresman, and D. J. Fox, Gaussian, Inc., Wallingford CT, 2016.
- [S9] T. Lu, Q. Chen, *J. Comput. Chem.*, 2022, **43**, 539-555
- [S10] T. Lu, F. Chen, *J. Comput. Chem.* 2012, **33**, 580-592. Multiwfn 3.8 (dev) program: <http://sobereva.com/multiwfn/> .
- [S11] VMD 1.9.3 program: <http://www.ks.uiuc.edu/Research/vmd/> .
- [S12] K. Aidas, C. Angeli, K. L. Bak, V. Bakken, R. Bast, L. Boman, O. Christiansen, R. Cimiraglia, S. Coriani, P. Dahle, E. K. Dalskov, U. Ekstroem, T. Enevoldsen, J. J. Eriksen, P. Ettenhuber, B. Fernandez, L. Ferrighi, H. Fliegl, L. Frediani, K. Hald, A. Halkier, C. Haettig, H. Heiberg, T. Helgaker, A. C. Hennum, H. Hettema, E. Hjertenaes, S. Hoest, I.-M. Hoeyvik, M. F. Iozzi, B. Jansik, H. J. Aa. Jensen, D. Jonsson, P. Joergensen, J. Kauczor, S. Kirpekar, T. Kjaergaard, W. Klopper, S. Knecht, R. Kobayashi, H. Koch, J. Kongsted, A. Krapp, K. Kristensen, A. Ligabue, O. B. Lutnaes, J. I. Melo, K. V. Mikkelsen, R. H. Myhre, C. Neiss, C. B. Nielsen, P. Norman, J. Olsen, J. M. H. Olsen, A. Osted, M. J. Packer, F. Pawłowski, T. B. Pedersen, P. F. Provasi, S. Reine, Z. Rinkevicius, T. A. Ruden, K. Ruud, V. Rybkin, P. Salek, C. C. M. Samson, A. Sanchez de Meras, T. Saue, S. P. A. Sauer, B. Schimmelpfennig, K. Sneskov, A. H. Steindal, K. O. Sylvester-Hvid, P. R. Taylor, A. M. Teale, E. I. Tellgren, D. P. Tew, A. J. Thorvaldsen, L. Thøgersen, O. Vahtras, M. A. Watson, D. J. D. Wilson, M. Ziolkowski, H. Agren, "The Dalton quantum chemistry program system", *WIREs Comput. Mol. Sci.* 2014, **4**, 269–284; and Dalton, a molecular electronic structure program, Release Dalton2019.alpha (2019), see <http://daltonprogram.org>.

VI. Copies of  $^1\text{H}$ ,  $^{13}\text{C}$  NMR and HRMS spectra of HPM-F isomers.

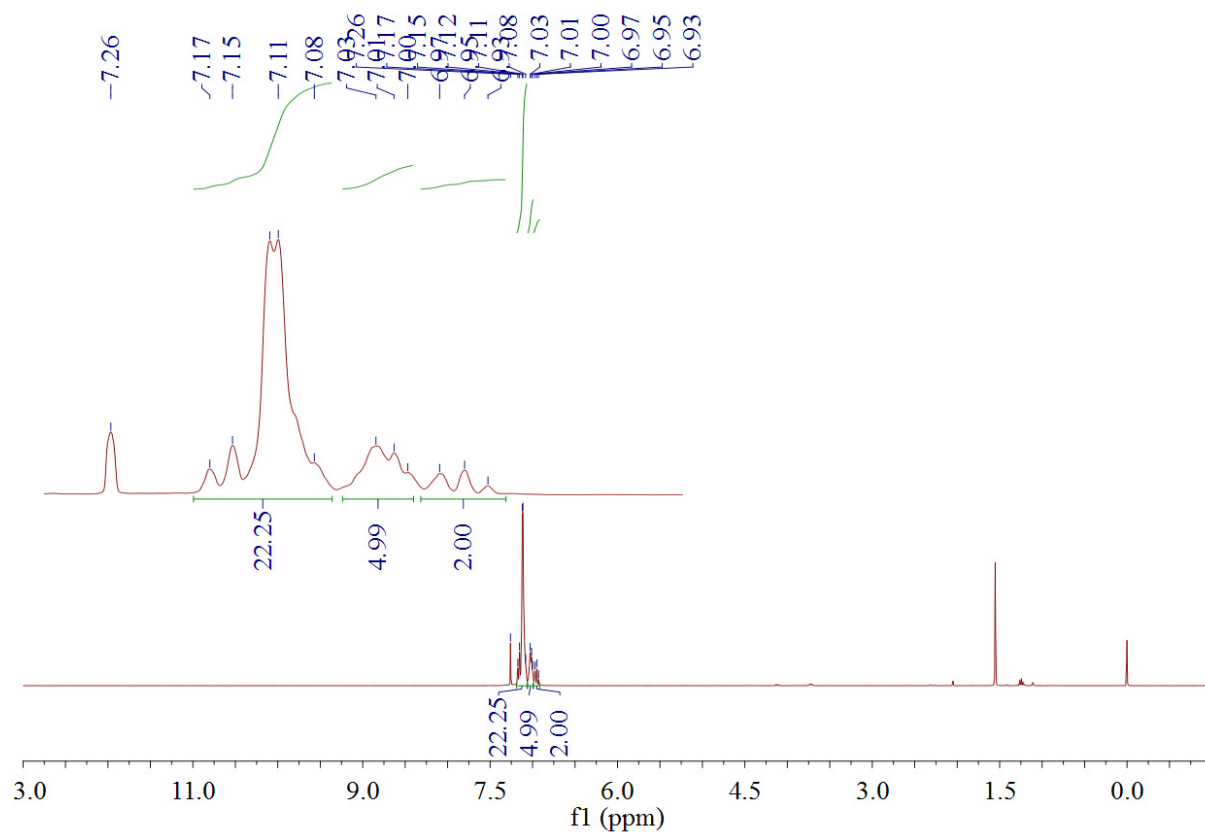

Fig. S12  $^1\text{H}$  NMR spectrum of HPM-*o*-F in  $\text{CDCl}_3$ .

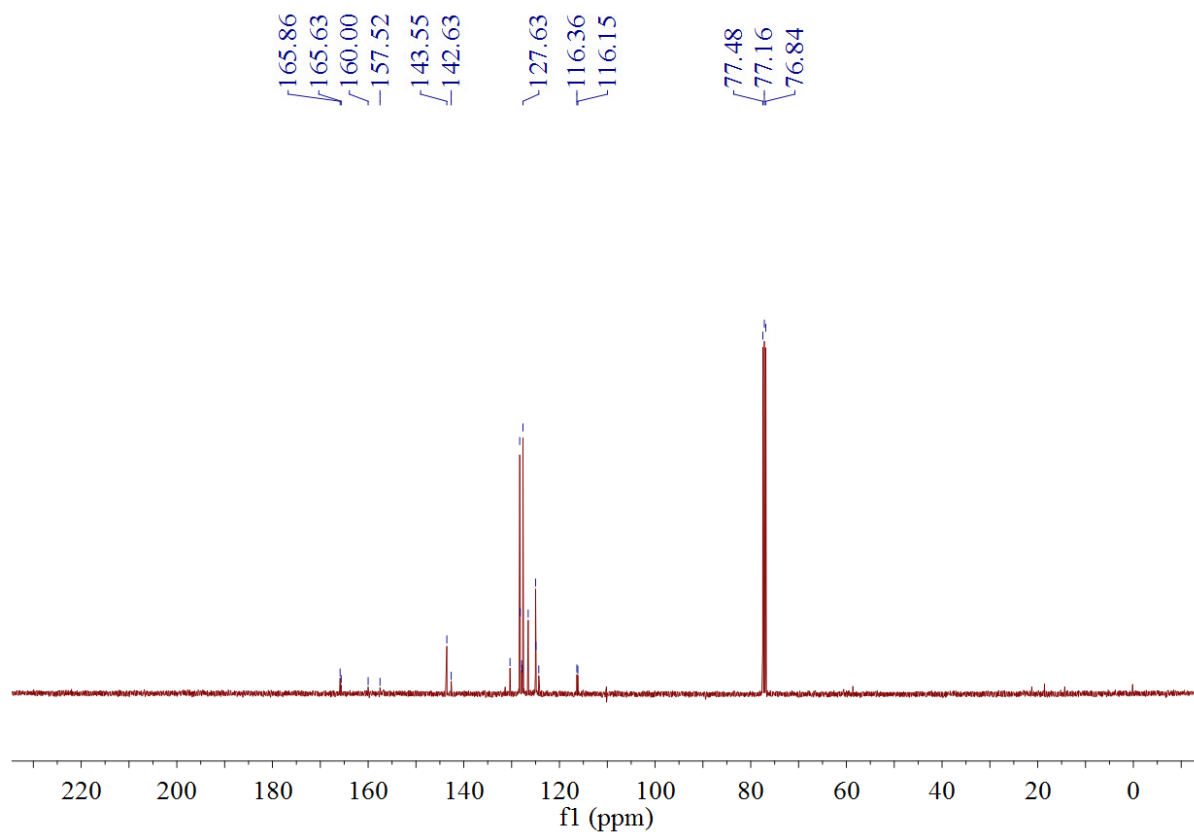

Fig. S13  $^{13}\text{C}$  NMR spectrum of HPM-*o*-F in  $\text{CDCl}_3$ .

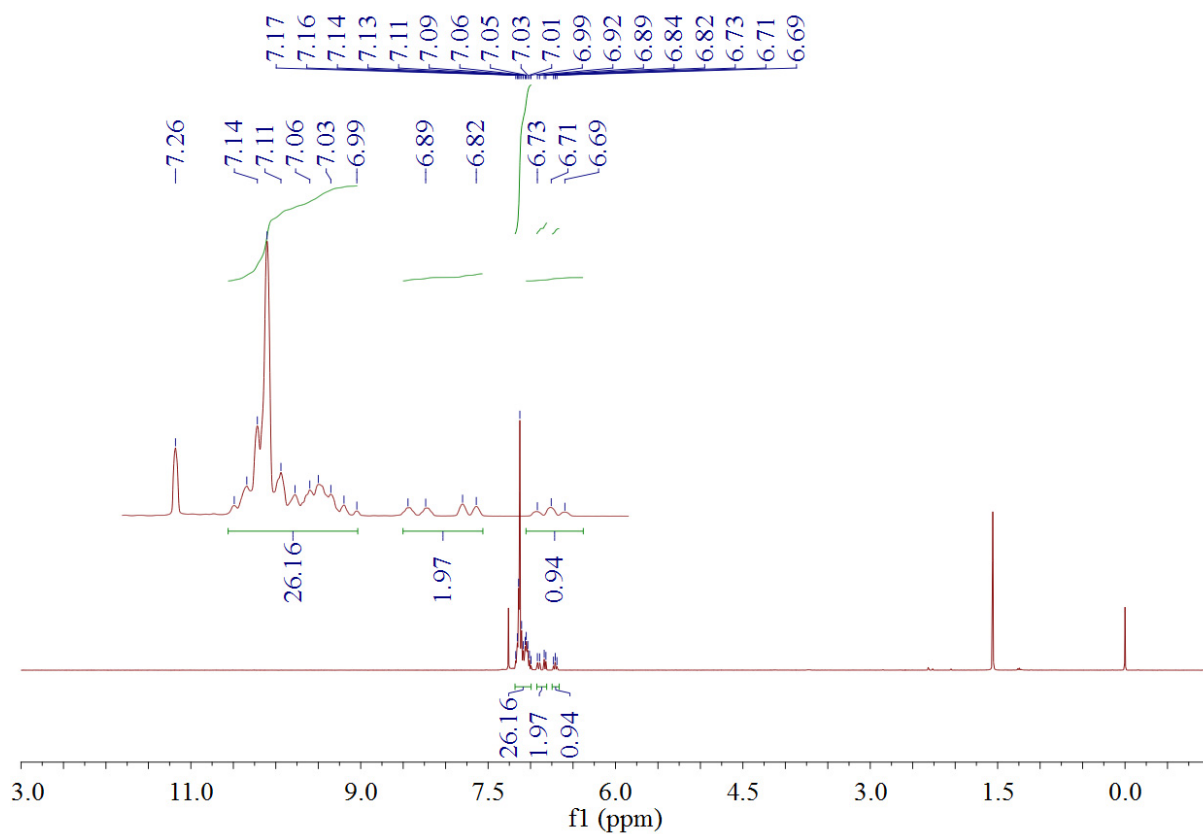

**Fig. S14**  $^1\text{H}$  NMR spectrum of HPM-*m*-F in  $\text{CDCl}_3$ .

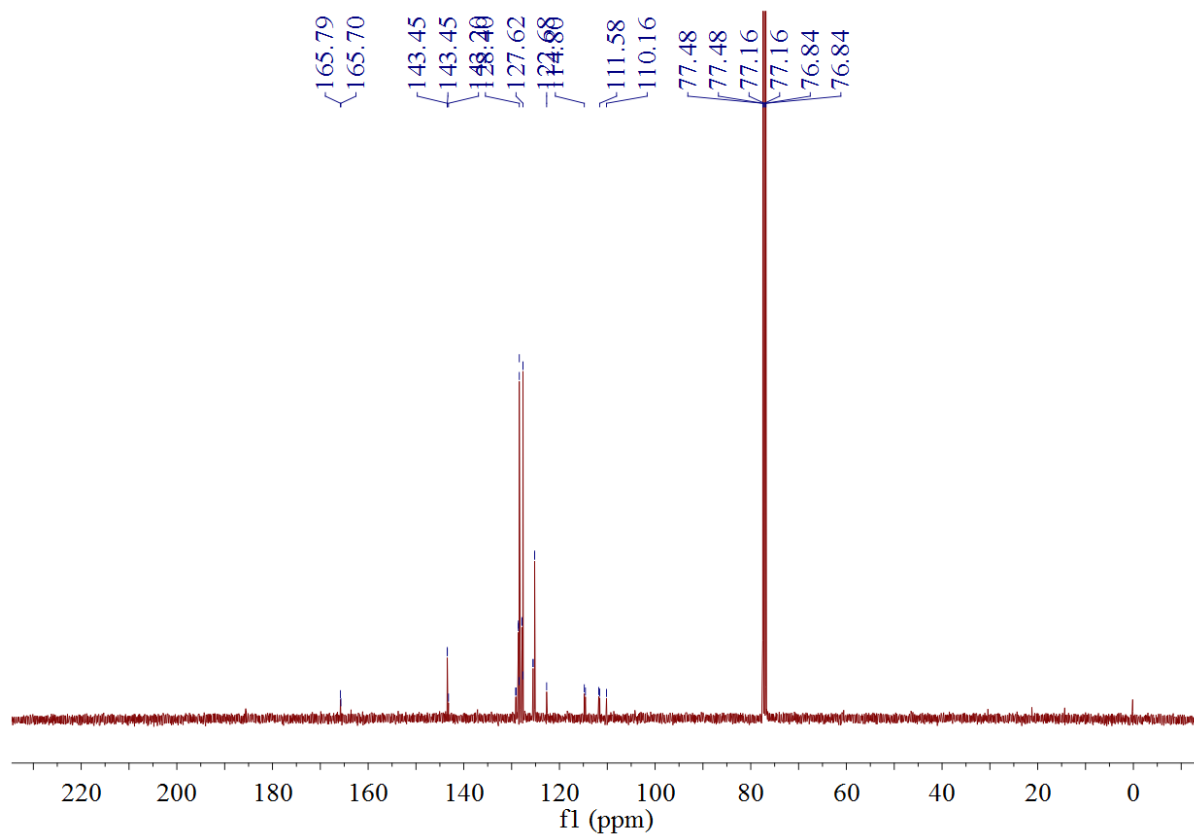

**Fig. S15**  $^{13}\text{C}$  NMR spectrum of HPM-*m*-F in  $\text{CDCl}_3$ .

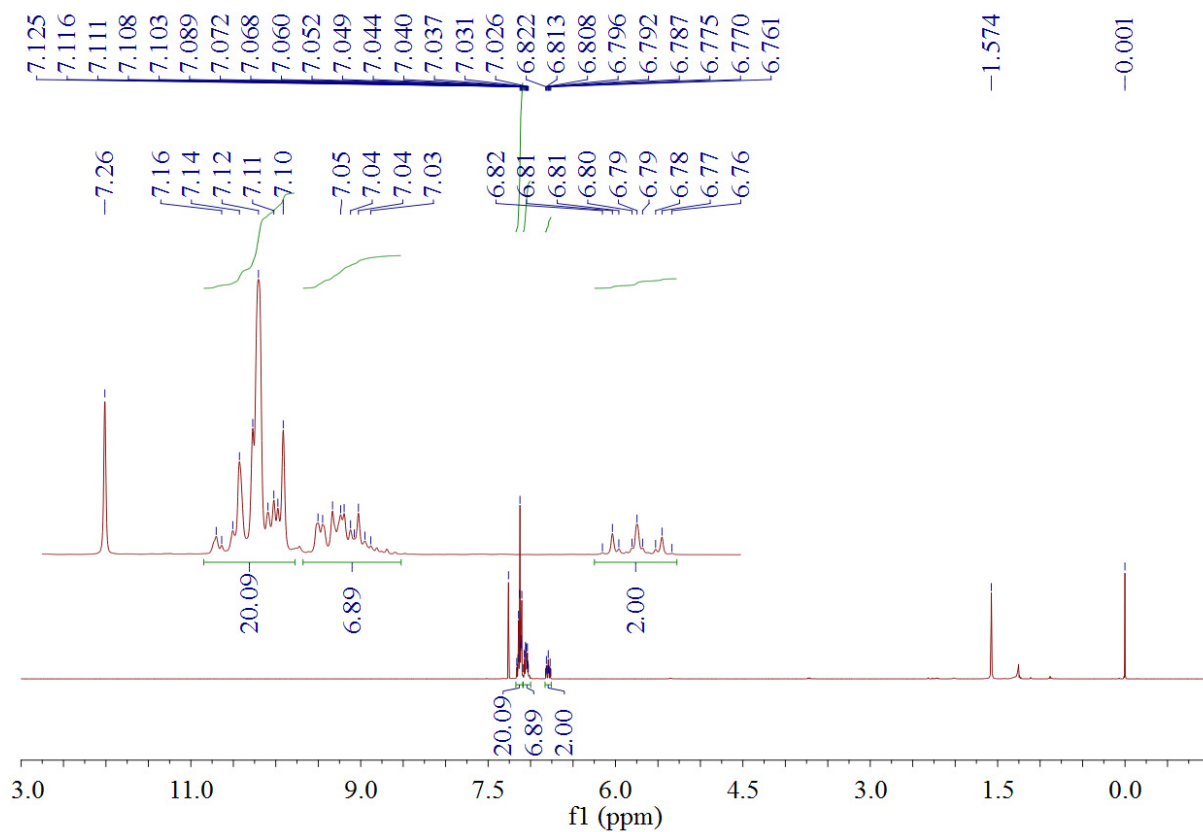

Fig. S16  $^1\text{H}$  NMR spectrum of HPM-*p*-F in  $\text{CDCl}_3$ .

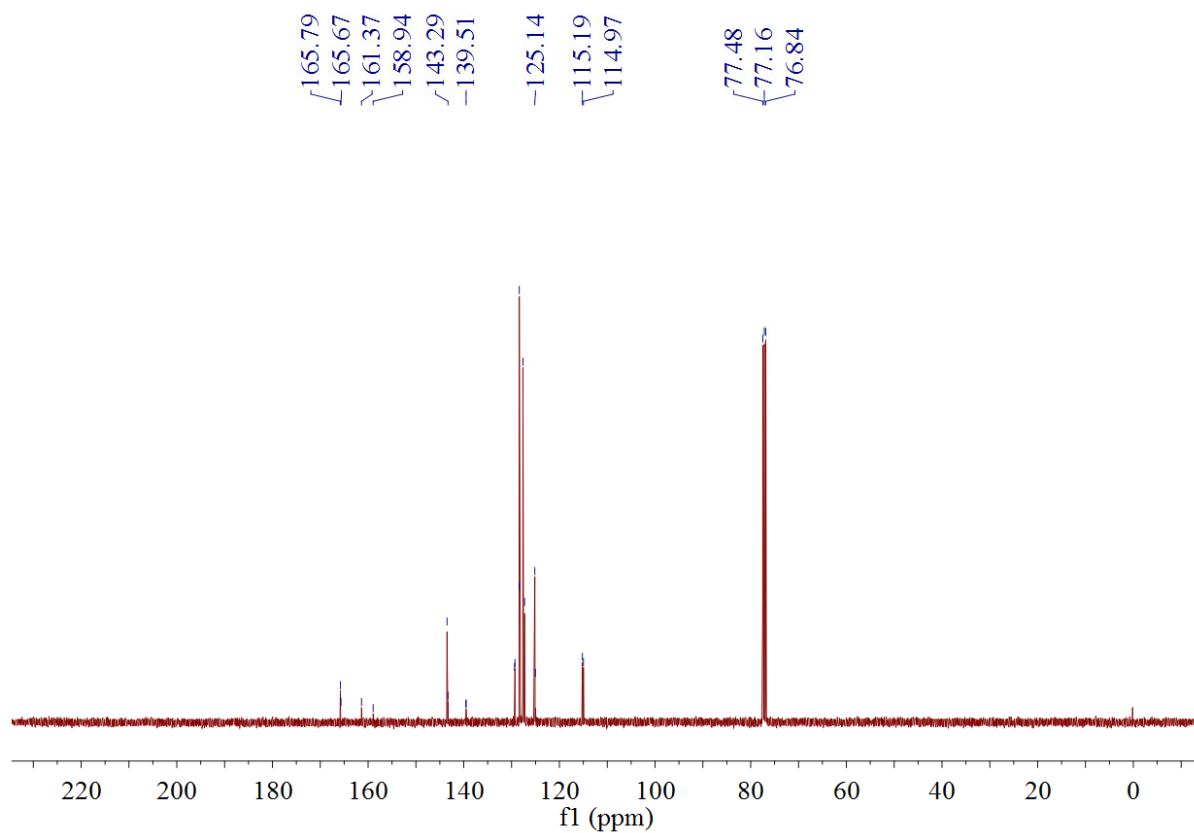

Fig. S17  $^{13}\text{C}$  NMR spectrum of HPM-*p*-F in  $\text{CDCl}_3$ .

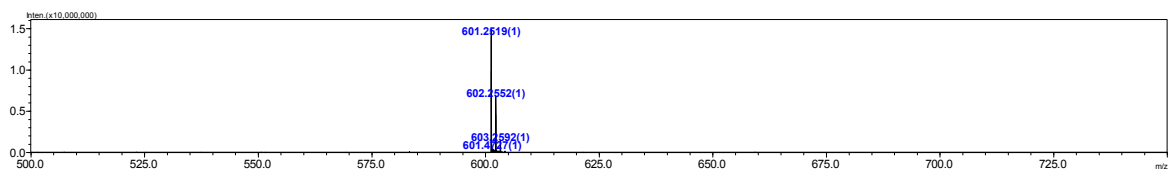

**Fig. S18** High-resolution mass spectrum of HPM-*o*-F

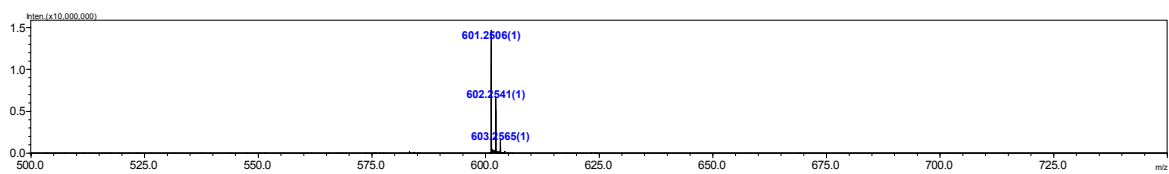

**Fig. S19** High-resolution mass spectrum of HPM-*m*-F

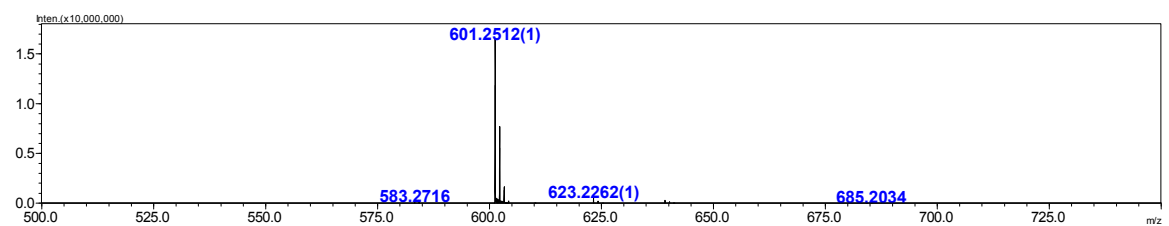

**Fig. S20** High-resolution mass spectrum of HPM-*p*-F
